# Supplementary material for: Unraveling the Influence of Litter Size, Maternal Care, Exercise, and Aging on Neurobehavioral Plasticity and Dentate Gyrus Microglia Dynamics in Rats
Source: Preprints.org preprint supplement (doi:10.20944/preprints202404.0898.v1), 2024-04-15
Supplement: Supplementary file 2 [file supplementary]

Table S6. Microglial polymorphic layer estimates for mature, exercised and sedentary rats raised in large and small litters. Experimental parameters, optical fractionator counting results and individual unilateral microglial numbers (N) and mean groups with the coefficient of error (CE).

| <i>Subjects</i>                               | <i>Section thickness (μm)</i> | <i>N</i>       | <i>CE</i> | <i>tsf</i>    | <i>No. of counting frames</i> | <i>ΣQ</i> | <i>Subjects</i>                               | <i>Section thickness (μm)</i> | <i>N</i>        | <i>CE</i> | <i>tsf</i>    | <i>No. of counting frames</i> | <i>ΣQ</i> |
|-----------------------------------------------|-------------------------------|----------------|-----------|---------------|-------------------------------|-----------|-----------------------------------------------|-------------------------------|-----------------|-----------|---------------|-------------------------------|-----------|
| <b>Mature Sedentary from Large Litters</b>    |                               |                |           |               |                               |           | <b>Mature Exercised from Large Litters</b>    |                               |                 |           |               |                               |           |
| <i>SM G39 EXP 96</i>                          | 21.0 ± 0.95                   | 22123.43       | 0.044     | 0.338 ± 0.017 | 207                           | 305       | <i>CAB G56 EXP 143</i>                        | 19.0 ± 0.64                   | 16844.02        | 0.048     | 0.371 ± 0.012 | 211                           | 259       |
| <i>VIDE G38 EXP 86</i>                        | 19.6 ± 1.06                   | 16861.75       | 0.047     | 0.363 ± 0.018 | 198                           | 253       | <i>DOR G56 EXP 142</i>                        | 19.5 ± 0.56                   | 21365.45        | 0.042     | 0.361 ± 0.010 | 211                           | 320       |
| <i>VIE G39 EXP 94</i>                         | 22.2 ± 0.96                   | 20119.39       | 0.050     | 0.318 ± 0.033 | 207                           | 263       | <i>PPE G56 EXP 144</i>                        | 20.4 ± 0.68                   | 23465.51        | 0.042     | 0.345 ± 0.011 | 202                           | 328       |
| <i>VSD G38 EXP 89</i>                         | 19.0 ± 0.57                   | 21918.56       | 0.043     | 0.370 ± 0.011 | 209                           | 336       | <i>VIDE G41 EXP 105</i>                       | 24.5 ± 0.32                   | 20521.48        | 0.047     | 0.286 ± 0.003 | 218                           | 242       |
| <i>VID G39 EXP 92</i>                         | 20.8 ± 1.79                   | 18787.87       | 0.048     | 0.347 ± 0.028 | 203                           | 274       | <i>VME G47 EXP 106</i>                        | 21.5 ± 1.45                   | 20123.41        | 0.048     | 0.332 ± 0.023 | 209                           | 278       |
| <b>Mean</b>                                   | 20.5 ± 0.56                   | <b>19962.2</b> | 0.046     |               |                               |           | <b>Mean</b>                                   | 20463.97                      | <b>20463.97</b> | 0.045     |               |                               |           |
| <b>SD</b>                                     |                               | 2208.778       |           |               |                               |           | <b>SD</b>                                     |                               | 2400.273        |           |               |                               |           |
| <b>CV<sup>2</sup>=(SD/Mean)<sup>2</sup></b>   |                               | 0.012          |           |               |                               |           | <b>CV<sup>2</sup>=(SD/Mean)<sup>2</sup></b>   |                               | 0.014           |           |               |                               |           |
| <b>CE<sup>2</sup></b>                         |                               | 0.002          |           |               |                               |           | <b>CE<sup>2</sup></b>                         |                               | 0.002           |           |               |                               |           |
| <b>CE<sup>2</sup>/CV<sup>2</sup></b>          |                               | 0.1739         |           |               |                               |           | <b>CE<sup>2</sup>/CV<sup>2</sup></b>          |                               | 0.1497          |           |               |                               |           |
| <b>CVB<sup>2</sup></b>                        |                               | 0.010          |           |               |                               |           | <b>CVB<sup>2</sup></b>                        |                               | 0.012           |           |               |                               |           |
| <b>CVB<sup>2</sup> (% of CV<sup>2</sup>)</b>  |                               | 83             |           |               |                               |           | <b>CVB<sup>2</sup> (% of CV<sup>2</sup>)</b>  |                               | 85              |           |               |                               |           |
| <b>Mature Sedentary from Small Litters</b>    |                               |                |           |               |                               |           | <b>Mature Exercised from Small Litters</b>    |                               |                 |           |               |                               |           |
| <i>PAD G52 EXP 136</i>                        | 16.3 ± 0.30                   | 11971.18       | 0.054     | 0.441 ± 0.013 | 202                           | 214       | <i>DOR G51 EXP 126</i>                        | 24.0 ± 1.11                   | 12888.41        | 0.065     | 0.296 ± 0.015 | 216                           | 156       |
| <i>PPE G52 EXP 135</i>                        | 14.5 ± 0.91                   | 13099.32       | 0.047     | 0.506 ± 0.033 | 200                           | 259       | <i>CAB G32 EXP 124</i>                        | 24.4 ± 0.35                   | 14652.8         | 0.059     | 0.289 ± 0.004 | 210                           | 174       |
| <i>SM G32 EXP 148</i>                         | 15.3 ± 0.29                   | 11548.52       | 0.050     | 0.442 ± 0.005 | 201                           | 220       | <i>VID G37 EXP 70</i>                         | 19.4 ± 0.97                   | 16278.53        | 0.049     | 0.367 ± 0.019 | 212                           | 248       |
| <i>SM G52 EXP 134</i>                         | 18.9 ± 0.92                   | 15869.08       | 0.046     | 0.365 ± 0.018 | 222                           | 243       | <i>VMD EXP 52</i>                             | 20.1 ± 0.91                   | 14034.62        | 0.055     | 0.354 ± 0.017 | 208                           | 204       |
| <i>VSDE G37 EXP 71</i>                        | 15.6 ± 0.75                   | 14771.88       | 0.047     | 0.452 ± 0.026 | 212                           | 275       | <i>VME G36 EXP 67</i>                         | 19.5 ± 1.26                   | 15602.15        | 0.049     | 0.366 ± 0.022 | 210                           | 235       |
| <b>Mean</b>                                   | 16.1 ± 0.75                   | <b>13452</b>   | 0.049     |               |                               |           | <b>Mean</b>                                   | 21.5 ± 1.11                   | <b>14691.3</b>  | 0.055     |               |                               |           |
| <b>S.D.</b>                                   |                               | 1838.804       |           |               |                               |           | <b>S.D.</b>                                   |                               | 1325.903        |           |               |                               |           |
| <b>CV<sup>2</sup>=(D.P./Mean)<sup>2</sup></b> |                               | 0.019          |           |               |                               |           | <b>CV<sup>2</sup>=(D.P./Mean)<sup>2</sup></b> |                               | 0.010           |           |               |                               |           |
| <b>CE<sup>2</sup></b>                         |                               | 0.002          |           |               |                               |           | <b>CE<sup>2</sup></b>                         |                               | 0.003           |           |               |                               |           |
| <b>CE<sup>2</sup>/CV<sup>2</sup></b>          |                               | 0.1268         |           |               |                               |           | <b>CE<sup>2</sup>/CV<sup>2</sup></b>          |                               | 0.3768          |           |               |                               |           |
| <b>CVB<sup>2</sup></b>                        |                               | 0.016          |           |               |                               |           | <b>CVB<sup>2</sup></b>                        |                               | 0.005           |           |               |                               |           |
| <b>CVB<sup>2</sup> (% of CV<sup>2</sup>)</b>  |                               | 87             |           |               |                               |           | <b>CVB<sup>2</sup> (% of CV<sup>2</sup>)</b>  |                               | 62              |           |               |                               |           |

<sup>a</sup>All evaluations were performed using a 100X objective lens (Nikon, NA 1.3, DF = 0.19μm). a(frame)- area of the optical dissector counting frame = 60 x 60 μm<sup>2</sup>; A(x,y step), x and y step sizes = 120 x 120; asf, area sampling fraction [a(frame)/A(x,y step)] = 0.25; tsf, thickness sampling fraction, calculated by the height of optical dissector = 7μm divided by section thickness, h/section thickness; ssf, section sampling fraction = 1/6; number of sections = 5; ΣQ, counted microglial markers.
